# Supplementary material
Source: publisher site journal article supplement (https://www.dovepress.com/article/275336)
Supplement: Supplementary file 1 [file get_supplementary_file.php]

Supplementary figure 1 Mean plasma (a) evogliptin M7, (b) M8 and pioglitazone (c) M3, (d) M4 concentration-time profiles at steady-state after EVO, PIO or EVO+PIO

Notes: Error bars represent standard deviations.
